# Supplementary material for: MicroRNA-7-5p mediates the signaling of hepatocyte growth factor to suppress oncogenes in the MCF-10A mammary epithelial cell
Source: PubMed Central journal article supplement (PMC5684415; doi:10.1038/s41598-017-15846-z), 2017-11-13

**MicroRNA-7-5p mediates the signaling of hepatocyte  
growth factor to suppress oncogenes in the MCF-10A  
mammary epithelial cell**

Dawoon Jeong, Juyeon Ham, Sunbin Park, Seungyeon Lee, Hyunkyung Lee, Han-Sung  
Kang, and Sun Jung Kim

**Supporting Information**

**Table S1. Genes that are deregulated by miR-7 and predicted to be affected by HGF**

| <b>Gene symbol</b> | <b>Description</b>                              | <b>Prediction<sup>a</sup></b> | <b>Expression fold change</b> |
|--------------------|-------------------------------------------------|-------------------------------|-------------------------------|
| UBE2C              | Ubiquitin-Conjugating Enzyme E2C                | Activated                     | 5.17                          |
| TTK                | TTK Protein Kinase                              | Activated                     | 2.785                         |
| TRIP13             | Thyroid Hormone Receptor Interactor 13          | Activated                     | 2.549                         |
| TPX2               | TPX2, Microtubule-Associated                    | Activated                     | 2.849                         |
| STIL               | SCL/TAL1 Interrupting Locus                     | Activated                     | 2.211                         |
| PTGS1              | Prostaglandin-Endoperoxide Synthase 1           | Activated                     | -2.067                        |
| PRC1               | Protein Regulator Of Cytokinesis 1              | Activated                     | 4.134                         |
| PLK1               | Polo-Like Kinase 1                              | Activated                     | 2.413                         |
| NEK2               | NIMA-Related Kinase 2                           | Activated                     | 4.744                         |
| NDC80              | NDC80 Kinetochore Complex Component             | Activated                     | 2.189                         |
| MELK               | Maternal Embryonic Leucine Zipper Kinase        | Activated                     | 2.8                           |
| KIF2C              | Kinesin Family Member 2C                        | Activated                     | 2.676                         |
| KIF20B             | Kinesin Family Member 20B                       | Activated                     | 2.074                         |
| KIF11              | Kinesin Family Member 11                        | Activated                     | 2.62                          |
| ISG20              | Interferon Stimulated Exonuclease Gene          | Activated                     | 2.182                         |
| HMMR               | Hyaluronan-Mediated Motility Receptor           | Activated                     | 5.12                          |
| FOXM1              | Forkhead Box M1                                 | Activated                     | 2.41                          |
| CRY1               | Cryptochrome Circadian Clock 1                  | Activated                     | 2.537                         |
| CENPF              | Centromere Protein F, 350/400kDa                | Activated                     | 4.192                         |
| CDKN3              | Cyclin-Dependent Kinase Inhibitor 3             | Activated                     | 2.798                         |
| CDK1               | Cyclin-Dependent Kinase 1                       | Activated                     | 2.689                         |
| CDC45              | Cell Division Cycle 45                          | Activated                     | 4.183                         |
| CDC25C             | Cell Division Cycle 25C                         | Activated                     | 3.462                         |
| CDC20              | Cell Division Cycle 20                          | Activated                     | 3.475                         |
| CCNF               | Cyclin F                                        | Activated                     | 2.209                         |
| CCNE2              | Cyclin E2                                       | Activated                     | 2.083                         |
| BUB1               | BUB1 Mitotic Checkpoint Serine/Threonine Kinase | Activated                     | 3.17                          |
| BIRC5              | Baculoviral IAP Repeat Containing 5             | Activated                     | 4.6                           |
| AURKB              | Aurora Kinase B                                 | Activated                     | 4.471                         |
| AURKA              | Aurora Kinase A                                 | Activated                     | 2.33                          |
| CRYAB              | Crystallin, Alpha B                             | Inhibited                     | -2.355                        |
| BNC1               | Basonuclin 1                                    | Inhibited                     | -2.055                        |

<sup>a</sup>The status of HGF that results in the same expression profile of the target gene of miR-7 in the miR-7-overexpressing MCF-10A

**Table S2. Sequences of primers applied in this study**

| <b>Genes</b> | <b>Product name or sequence (5'-3')</b>                | <b>Supplier</b> | <b>Catalog no.</b> |
|--------------|--------------------------------------------------------|-----------------|--------------------|
| miR-7-5p     | Hs_miR-7_2 miScript Primer Assay                       | Qiagen          | MS00032116         |
| RNU6         | Hs_RNU6-2_11 miScript Primer Assay                     |                 | MS00033740         |
| GAPDH        | F: CAGGAGGCATTGCTGATGAT<br>R: GAAGGCTGGGGCTCATTT       | Genotech        |                    |
| HGF          | F: CGTCATATCTTCTGGGAACCA<br>R: TGTGGTATCACCTTCACAACG   |                 |                    |
| EGFR         | F: GCGTTCGGCACGGTGTATAA<br>R: GGCTTTCGGAGATGTTGCTTC    |                 |                    |
| KLF4         | F: GTCTTGAGGAAGTGCTGAGC<br>R: ATCGTCTTCCCCTCTTTGGC     |                 |                    |
| SET8         | F: ACTTACGGATTTCTACCCTGTC<br>R: CGATGAGGTCAATCTTCATTCC |                 |                    |
| FAK(PTK2)    | F: ACCAGAGGAGTGGAATATGAA<br>R: AATCGCTCTTCACCTGTTGAT   |                 |                    |
| PAK1         | F: AGGTGGCCATTAAGCAGATG<br>R: CTCCCACGAGGTAAGTGTCC     |                 |                    |

**Figure S1. Pathways obtained from KEGG enrichment analysis of genes differentially expressed by miR-7.** The KEGG pathways were ranged according to their transcriptional coverage the *P*-value. The top six pathways with the *P*-value <0.05 were presented.

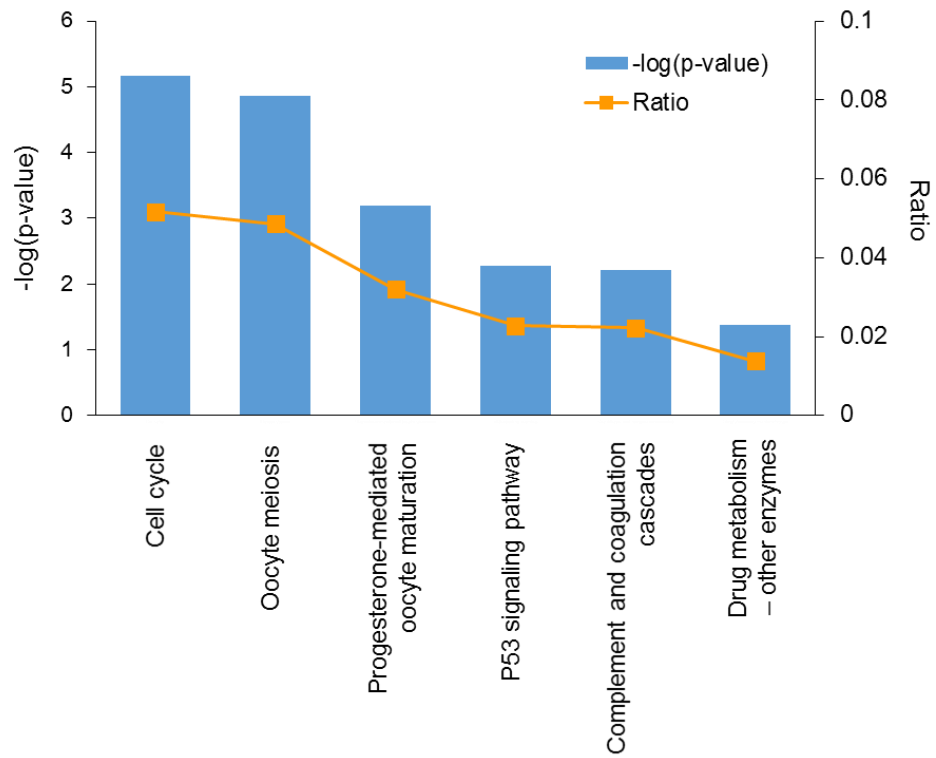

**Figure S2. Association of HGF and miR-7 expression in human tissues.** Expression level of HGF and miR-7 in various tissues was extracted from the TCGA database (<https://cancergenome.nih.gov/>) and the association analysis was performed on the MethHC platform (<http://methhc.mbc.nctu.edu.tw/php/index.php>). Only tissues with the number > 40 were considered for analysis. The association between HGF and miR-7 was determined by linear regression, and represented by the coefficient of determination ( $R^2$ ). A, normal liver; B, liver cancer; C, normal head and neck; D, head and neck cancer; E, bladder cancer; F, colon cancer.

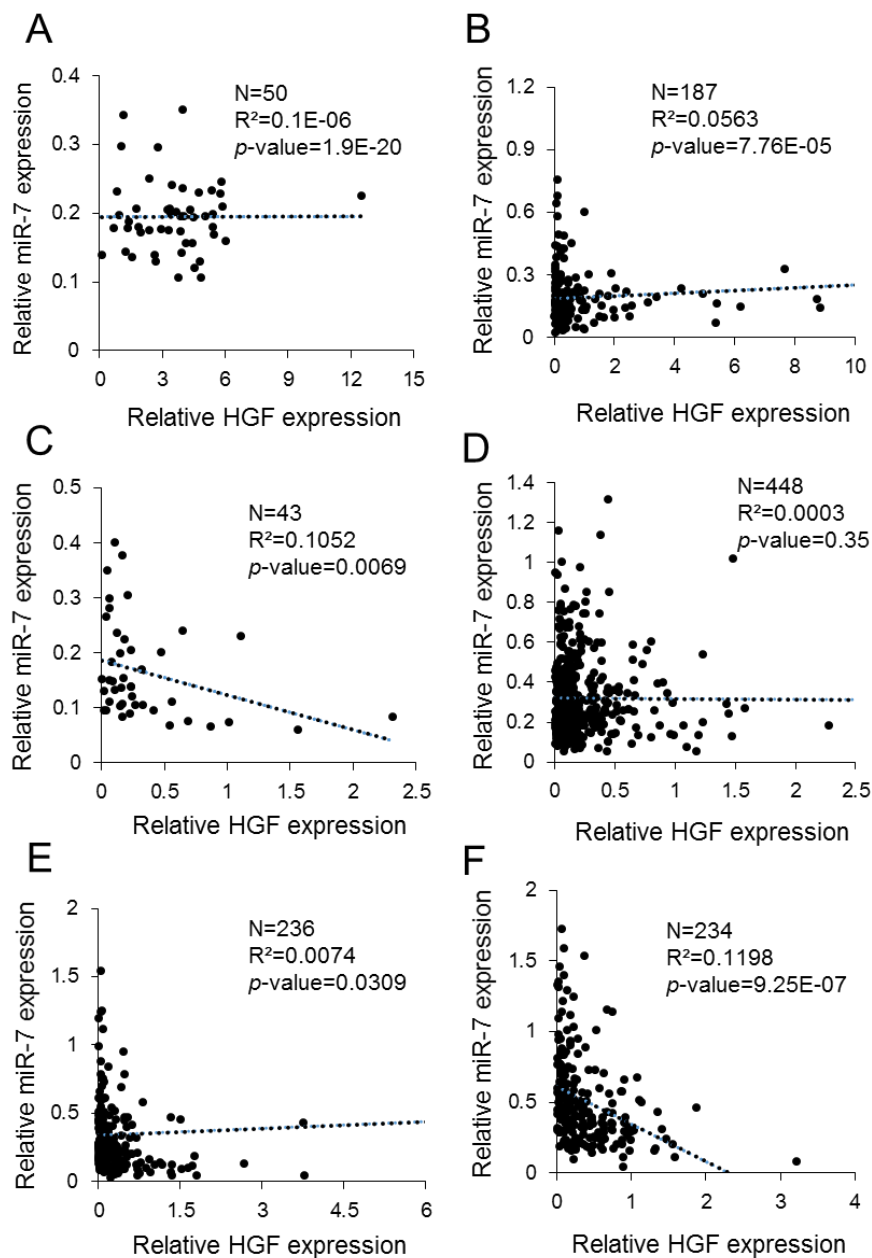

**Figure S3. Effect of HGF and miR-7 on the cell proliferation of MCF-10A.** The cells were treated with HGF (A), miR-7 (B), or both HGF and miR-7 (C). HGF protein was added into the culture media and miR-7 mimic (or inhibitor) was transiently transfected. In B and C, 40 ng/ml of HGF, 40 nM of siHGF, and 20 nM of mimic and inhibitor for miR were used. At the indicated time or day, the proliferation was monitored by measuring the CCK-8 dye-based absorbance. All experiment were carried out in triplicate and indicated as mean  $\pm$  SE. NC, negative control; siHGF, siRNA for HGF.

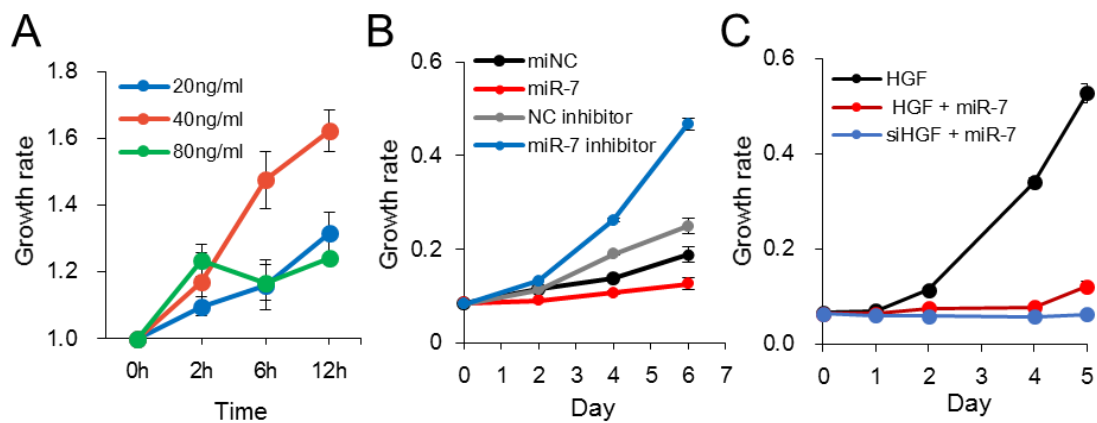

**Figure S4. Confirmation of treatment of mimic miR and siRNAs onto MCF-10A cells. (A)**

Appropriate treatment of mimic miR and siRNA to the cell culture was confirmed by qPCR.

(A) Downregulation of HGF by an siRNA. (B) Upregulation of miR-7 by a mimic miR. (C)

Downregulation of miR-7 by an inhibitor. All experiment were carried out in triplicate and

indicated as mean  $\pm$  SE. NC, negative control.

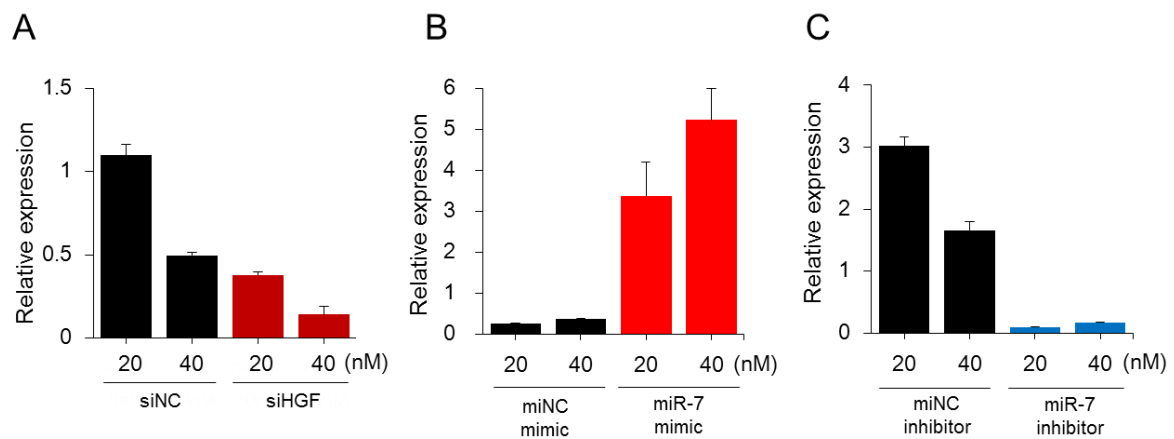

Supplement: 41598_2017_15846_MOESM1_ESM.pdf [file 41598_2017_15846_MOESM1_ESM.pdf]
